# Supplementary material for: Cancer cell-expressed SLAMF7 is not required for CD47-mediated phagocytosis
Source: PubMed Central journal article supplement (PMC6358615; doi:10.1038/s41467-018-08013-z), 2019-02-01
Supplement: 41467_2018_8013_MOESM2_ESM.pdf [file 41467_2018_8013_MOESM2_ESM.pdf]

**Supplementary Information File**

**Cancer cell expressed SLAMF7 is not required for CD47-mediated phagocytosis**

He et al.

## Supplementary Figure 1

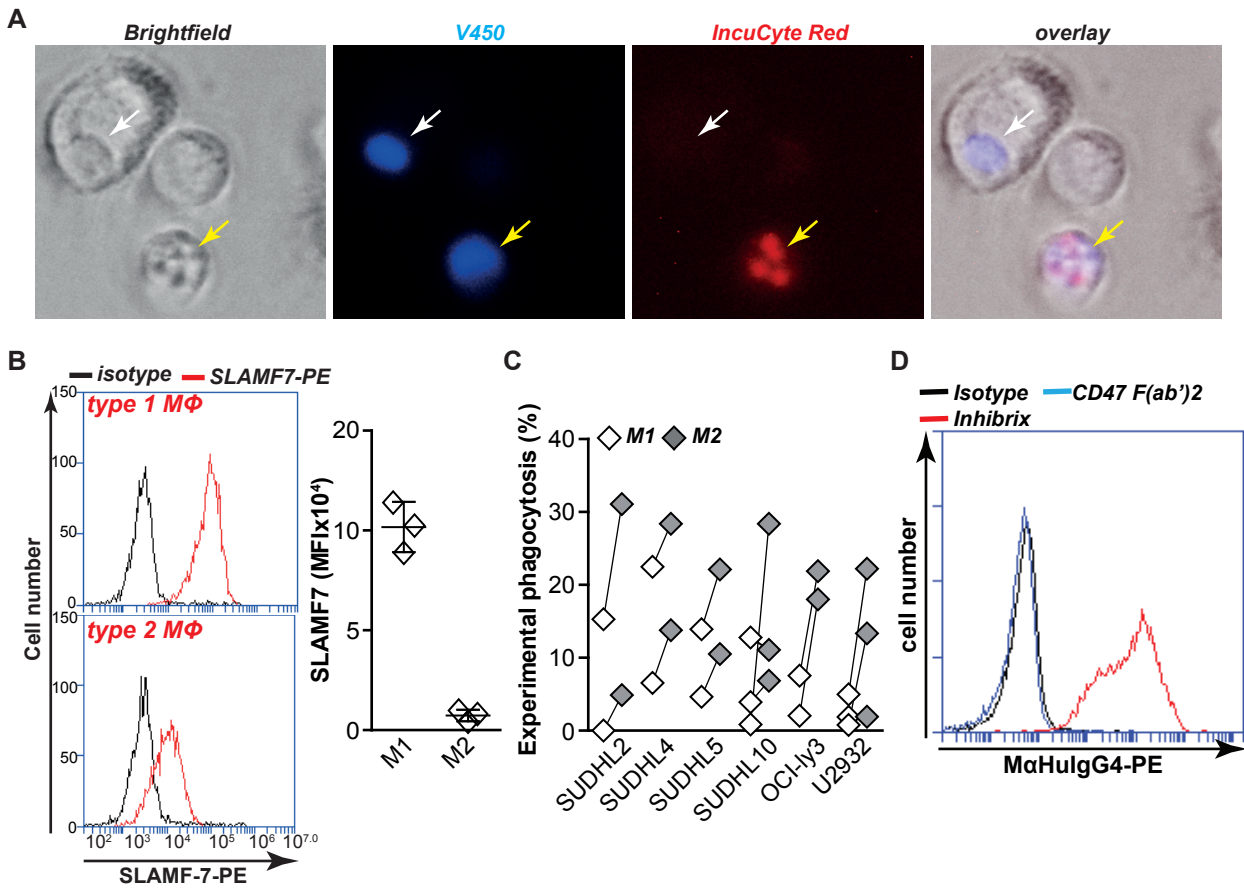

**Supplementary Figure 1. A.** V450 and IncuCyte caspase-Red labelled cancer cells were incubated with macrophages for 2h, after which phagocytosis was assessed by fluorescent microscopy. **White arrows:** V450 and IncuCyte caspase-Red negative cancer cells inside a macrophage. **Yellow arrows:** V450 and IncuCyte caspase-Red positive apoptotic cancer cell that is not phagocytosed. **B.** SLAMF-7 expression level on both type 1 and type 2 macrophage derived from matched donors. **C.** Comparison of phagocytosis by CD47 F(ab')<sub>2</sub> in 6 DLBCL lines between type 1 macrophage and type 2 macrophage (n=2). **D.** Validation of removal of the Fc domain from the CD47 F(ab')<sub>2</sub> preparation. Presence of human IgG4 was assessed using PE-conjugated hulG4 antibody after incubation of inhibrix en CD47 F(ab')<sub>2</sub> on CD47-expressing Jurkat cells, with no residual IgG4 staining after incubation with CD47 F(ab')<sub>2</sub>.

## Supplementary Fig.2

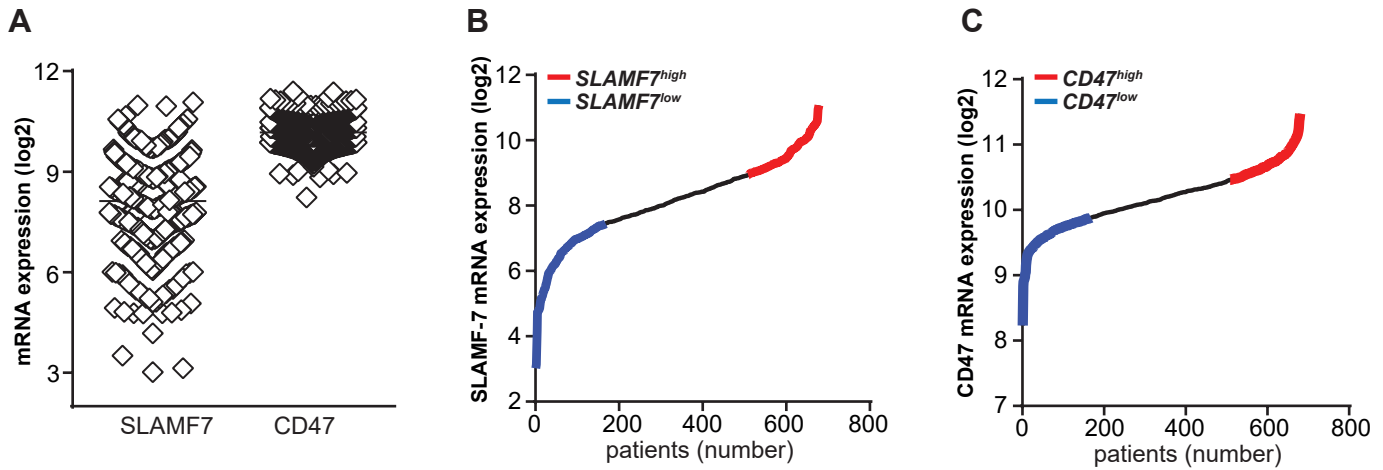

### Supplemental Figure 2

**A.** SLAMF7 and CD47 gene expression profiles (log2) of 677 rituximab-cyclophosphamide-vincristin-doxorubicin-prednisone treated Diffuse Large B-cell lymphoma patients obtained from the public domain. **B.** Distribution of SLAMF7 expression, in blue SLAMF7 low expressing patients and in red SLAMF7 high expressing patients. **C.** Distribution of CD47 expression, in blue CD47 low expressing patients and in red CD47 high expressing patients.

Supplementary Fig. 3

A

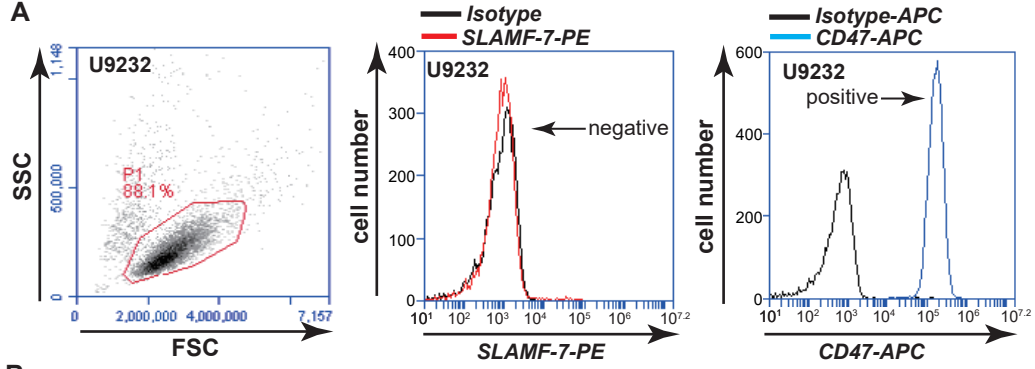

B

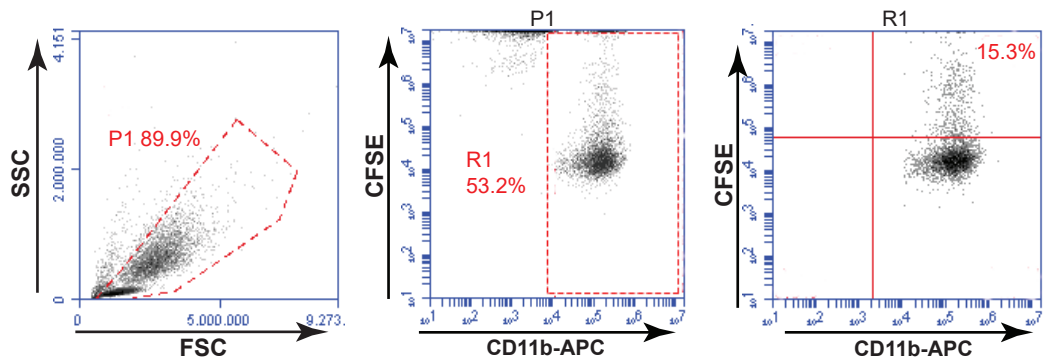

**Supplementary Figure 3.** A. Representative gating strategy for cell surface staining of SLAMF-7 (or CD47), as exemplified using staining of U9232. B. Representative gating strategy for flow cytometric phagocytosis assay, using CFSE-labeled tumors and CD11b-labeled macrophages.

## Supplementary Tables

Supplemental Table 1. Patient characteristics

| Variables                                | R-CHOP treated DLBCL patients (n=680) |
|------------------------------------------|---------------------------------------|
| <b>Median age, years (range)</b>         | 63 (17-92)                            |
| <b>Gender</b>                            |                                       |
| Male, n(%)                               | 357 (58,2)                            |
| Female, n(%)                             | 256 (37,6)                            |
| Unknown, n(%)                            | 67 (9,9)                              |
| <b>COO</b>                               |                                       |
| germinal center b cell (GCB), n(%)       | 305 (44,9)                            |
| Non-GCB, n(%)                            | 375 (55,1)                            |
| <b>IPI categorized</b>                   |                                       |
| Low risk (0,1)                           | 235 (34,6)                            |
| Intermediate (2,3)                       | 259 (38,1)                            |
| High risk (4,5)                          | 71 (10,4)                             |
| Unknown, n(%)                            | 115 (16,9)                            |
| <b>Ann Arbor</b>                         |                                       |
| Non advanced stage of disease (1,2)      | 228 (33,5)                            |
| Advanced stage of disease (3,4)          | 255 (37,5)                            |
| Unknown, n(%)                            | 197 (29,0)                            |
| <b>Median SLAMF7 expression, (range)</b> | 8,20 (3,02-11,07)                     |
| <b>Median CD47 expression, (range)</b>   | 10,17 (8,23-11,47)                    |

Supplemental Table 2. GEO accession numbers

| GSE_serie identifier | number of patients | Platform | PMID     |          |          |          |          |          |
|----------------------|--------------------|----------|----------|----------|----------|----------|----------|----------|
| GSE31312             | 409                | GPL570   | 26324762 | 26248897 | 26111978 | 22437443 | 23982177 | 23775435 |
| GSE4475              | 13                 | GPL96    | 16760442 | 23143595 |          |          |          |          |
| GSE10846             | 233                | GPL570   | 19038878 | 21546504 |          |          |          |          |
| GSE23501             | 25                 | GPL570   | 20610814 |          |          |          |          |          |
